# Supplementary material for: Synthesis of nanoporous Mo:BiVO4 thin film photoanodes using the ultrasonic spray technique for visible-light water splitting
Source: Royal Society of Chemistry journal article supplement (doi:10.1039/c8na00209f), 2018-11-07
Supplement: c8na00209f1.pdf [file c8na00209f1.pdf]

**Synthesis of nanoporous Mo:BiVO<sub>4</sub> thin film photoanodes using ultrasonic spray technique  
for visible light water splitting**

*Sawanta S. Mali<sup>1</sup>, Gwang Ryeol Park, Hungjin Kim, HyunHoon Kim, Jyoti V. Patil and Chang*

*Kook Hong<sup>1\*</sup>*

*Polymer Energy Materials Laboratory, School of Applied Chemical Engineering, Chonnam*

*National University, Gwangju, 500-757 (South Korea),*

*E-mail: sawantasolar@gmail.com, hongck@chonnam.ac.kr*

**Figure S1** SEM micrographs of as deposited BiVO<sub>4</sub> electrodes (a) BiVO<sub>4</sub> (b) Mo:BiVO<sub>4</sub>

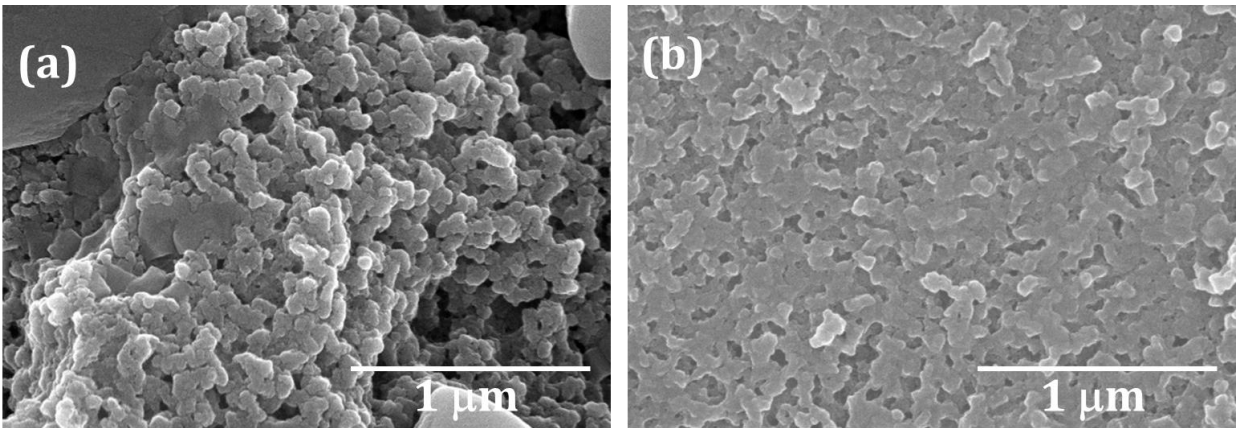

**Figure S2** UV-Vis spectra of BiVO<sub>4</sub> and Mo:BiVO<sub>4</sub> thin film deposited on FTO substrates. Inset shows a Tauc plots for respective samples.

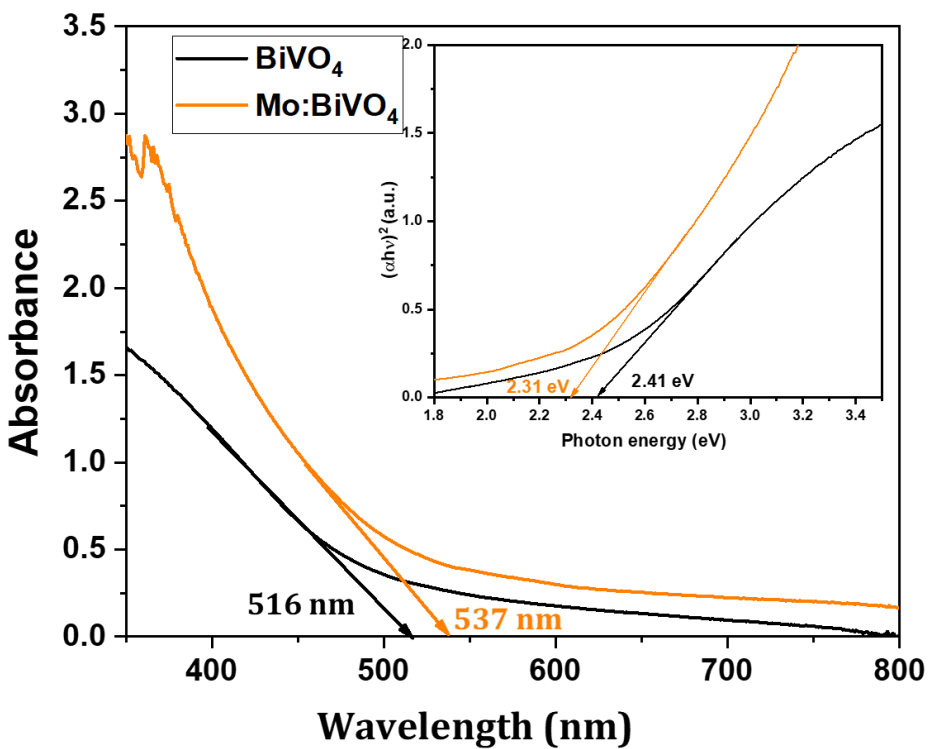

**Figure S3** Survey spectrum of Mo:BiVO<sub>4</sub> thin film

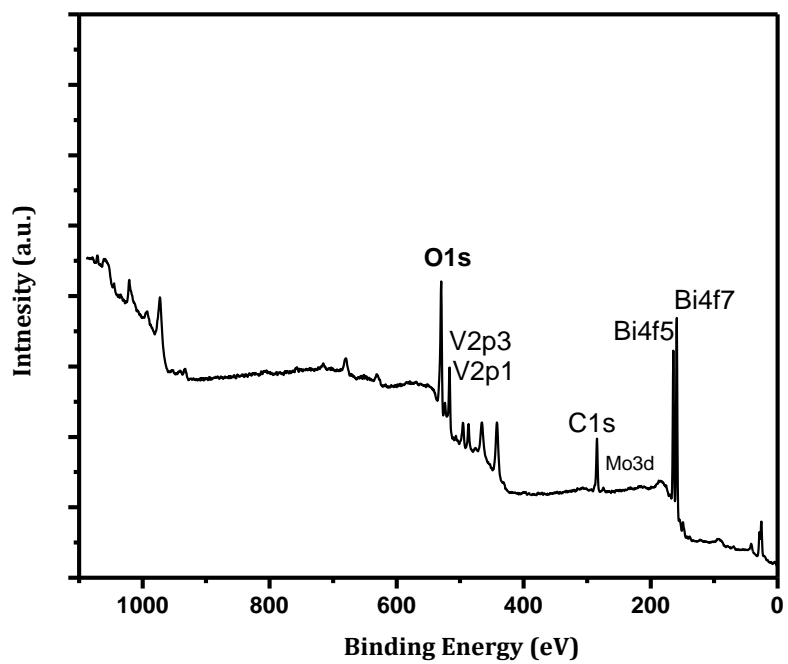

**Figure S4** EDS spectra of (a) BiVO<sub>4</sub> and (b) Mo:BiVO<sub>4</sub> thin films deposited on FTO substrate.

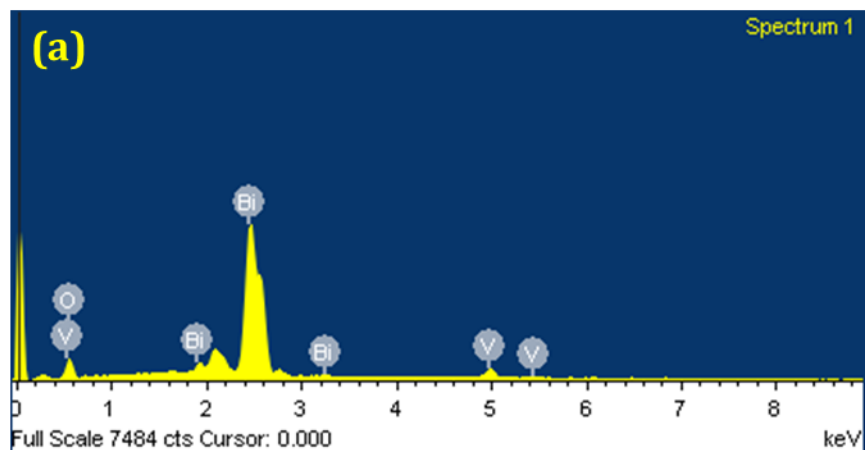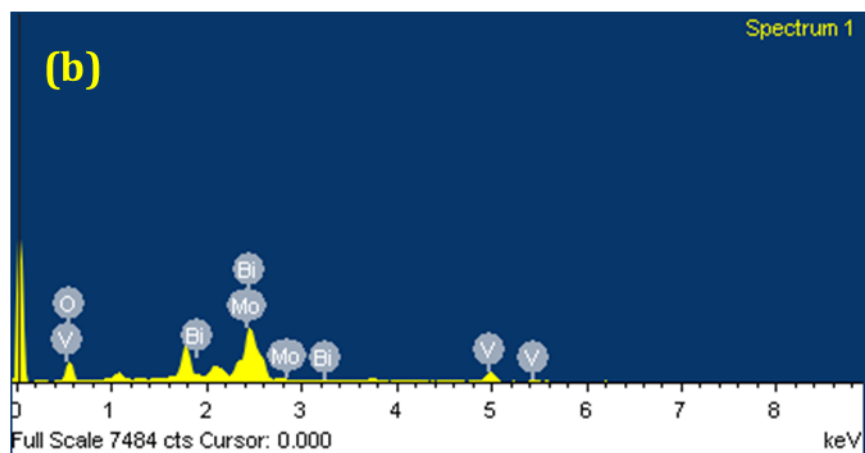

**Figure S5** Stability under chopped light for BiVO<sub>4</sub> and Mo:BiVO<sub>4</sub> electrodes at 1.23 V vs RHE.

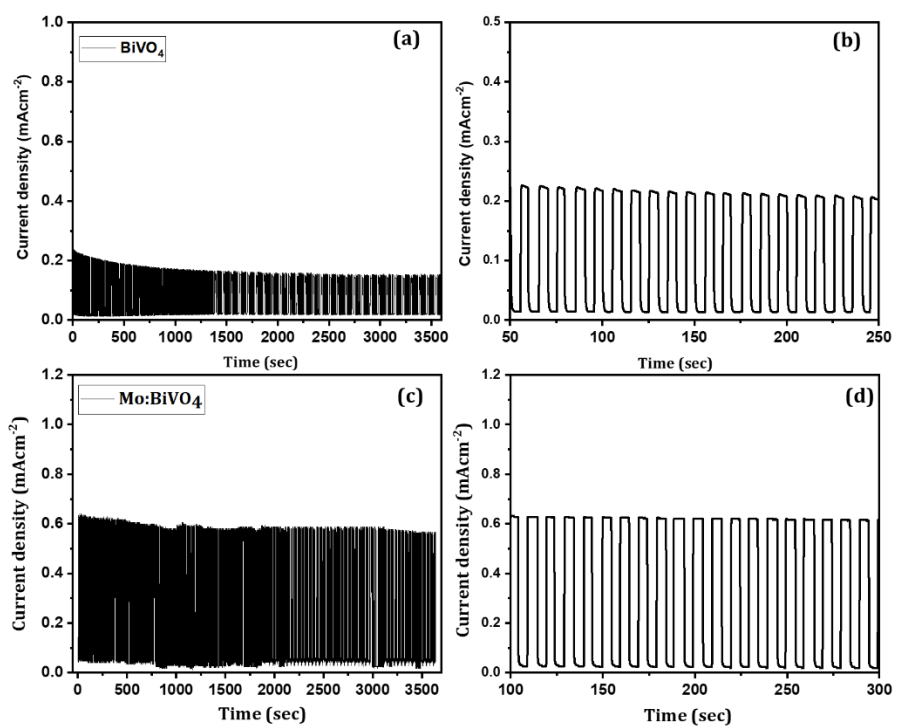

**Table S1** Standard and observed d values and their relative intensities of pristine and Mo doped BiVO<sub>4</sub> thin films.

| Sr. No. | 2 $\theta$ (standard) | 2 $\theta$ (observed) BiVO <sub>4</sub> | 2 $\theta$ (observed) Mo:BiVO <sub>4</sub> | (hkl) plane | Standard d (Å)<br>a=5.195<br>b=11.701<br>c=5.092 | Observed d (Å) | Observed (Å) | standard relative intensity I/I <sub>0</sub> (%) | observed relative intensity I/I <sub>0</sub> (%) | observed relative intensity I/I <sub>0</sub> (%) Mo:BiVO <sub>4</sub> |
|---------|-----------------------|-----------------------------------------|--------------------------------------------|-------------|--------------------------------------------------|----------------|--------------|--------------------------------------------------|--------------------------------------------------|-----------------------------------------------------------------------|
| 1.      | 15.140                | 15.0528                                 |                                            | 020         | 5.8470                                           | 5.888578       |              | 2                                                | 0.86                                             |                                                                       |
| 2.      | 18.669                | 18.6610                                 | 18.7766                                    | 110         | 4.7490                                           | 4.75509        | 4.72607      | 25                                               | 39.38                                            | 33.78                                                                 |
| 3.      | 18.988                | 18.8258                                 |                                            | 011         | 4.6700                                           | 4.71383        |              | 25                                               | 31.68                                            |                                                                       |
| 4.      | 28.586                |                                         |                                            | -130        | 3.1200                                           |                |              | 30                                               |                                                  |                                                                       |
| 5.      | 28.822                | 28.8074                                 | 28.7483                                    | -121        | 3.0950                                           | 3.09922        | 3.10288      | 100                                              | 100                                              | 100                                                                   |
| 6.      | 28.947                |                                         | 28.8689                                    | 121         | 3.0820                                           |                | 3.09787      | 95                                               | 3.09787                                          | 76.20                                                                 |
| 7.      | 30.548                | 30.4105                                 | 30.4298                                    | 040         | 2.9240                                           | 2.9393         | 2.93514      | 25                                               | 14.86                                            | 19.81                                                                 |
| 8.      | 34.494                | 34.4334                                 | 34.5095                                    | 200         | 2.5980                                           | 2.60464        | 2.59694      | 12                                               | 9.08                                             | 8.35                                                                  |
| 9.      | 35.221                | 35.1031                                 | 35.2183                                    | 002         | 2.5460                                           | 2.55647        | 2.54626      | 14                                               | 7.03                                             | 9.27                                                                  |
| 10.     | 37.866                |                                         | 37.6088                                    | 220         | 2.3740                                           |                | 2.38972      | 2                                                |                                                  | 0.32                                                                  |
| 11.     | 39.455                |                                         |                                            | -141        | 2.2820                                           |                |              | 6                                                |                                                  |                                                                       |
| 12.     | 39.545                |                                         |                                            | 141         | 2.2770                                           |                |              | 6                                                |                                                  |                                                                       |
| 13.     | 39.782                | 39.8110                                 |                                            | 211         | 2.2640                                           | 2.26433        |              | 12                                               | 10.83                                            |                                                                       |
| 14.     | 40.040                |                                         | 39.9676                                    | -112        | 2.2500                                           |                | 2.25395      | 10                                               |                                                  | 7.08                                                                  |
| 15.     | 40.245                |                                         |                                            | 112         | 2.2390                                           |                |              | 8                                                |                                                  |                                                                       |

|     |        |         |         |      |        |         |          |    |      |      |
|-----|--------|---------|---------|------|--------|---------|----------|----|------|------|
| 16. | 42.339 | 42.2739 |         | 150  | 2.1330 | 2.13794 |          | 8  | 5.08 |      |
| 17. | 42.464 |         | 42.3941 | 051  | 2.1270 |         | 2.130039 | 12 |      | 5.48 |
| 18. | 45.425 |         |         | -231 | 1.9950 |         |          | 6  |      |      |
| 19. | 45.594 |         |         | 231  | 1.9880 |         |          | 4  |      |      |
| 20. | 45.886 | 45.9381 | 45.8121 | -132 | 1.9760 | 1.97558 | 1.97908  | 6  | 5.95 | 5.52 |
| 21. | 46.034 |         |         | 132  | 1.9700 |         |          | 8  |      |      |
| 22. | 46.559 |         |         | 060  | 1.9490 |         |          | 4  |      |      |
| 23. | 46.711 | 46.6980 | 46.7663 | 240  | 1.9430 | 1.94519 | 1.94089  | 16 | 7.23 | 8.20 |
| 24. | 47.305 |         | 47.1501 | 042  | 1.9200 |         | 1.92599  | 16 |      | 8.76 |
| 25. | 49.960 |         | 50.0424 | -202 | 1.8240 |         | 1.82124  | 6  |      | 4.43 |
| 26. | 50.314 | 50.1243 |         | 202  | 1.8120 | 1.81996 |          | 8  | 3.78 |      |
| 27. | 53.011 |         |         | 222  | 1.7260 |         |          | 2  |      |      |
| 28. | 53.243 |         | 53.2105 | -161 | 1.7190 |         | 1.72003  | 18 |      | 7.16 |
| 29  | 53.310 | 53.3343 |         | 161  | 1.7170 | 1.71775 |          | 18 | 5.62 |      |
| 30. | 53.445 |         |         | 310  | 1.7130 |         |          | 4  |      |      |
| 31. | 54.581 |         |         | 013  | 1.6800 |         |          | 4  |      |      |
| 32. | 55.732 |         |         | -251 | 1.6480 |         |          | 2  |      |      |
| 33. | 55.879 |         | 55.84   | 251  | 1.6440 |         | 1.64486  | 4  |      | 1.23 |
| 34. | 56.065 |         |         | -152 | 1.6390 |         |          | 2  |      |      |
| 35. | 56.289 |         |         | 152  | 1.6330 |         |          | 2  |      |      |
| 36. | 57.913 |         |         | 170  | 1.5910 |         |          | 4  |      |      |
| 37. | 58.073 |         |         | 071  | 1.5870 |         |          | 6  |      |      |

|     |        |         |       |      |        |         |         |    |      |      |
|-----|--------|---------|-------|------|--------|---------|---------|----|------|------|
| 38. | 58.274 |         |       | -321 | 1.5820 |         |         | 10 |      |      |
| 39  | 58.530 | 58.4388 | 58.40 | 321  | 1.5757 | 1.57929 | 1.57883 | 10 | 4.09 | 4    |
| 40  | 59.261 | 59.2301 | 59.22 | 123  | 1.5580 | 1.56006 | 1.5588  | 8  | 3.40 | 3.71 |
